# Supplementary material for: Kinetics of electron recombination of dye-sensitized solar cells based on TiO2 nanorod arrays sensitized with different dyes
Source: Royal Society of Chemistry journal article supplement (doi:10.1039/c1cp22482d), 2011-01-01
Supplement: c1cp22482d.pdf [file c1cp22482d.pdf]

## Supporting Information

### Electron Recombination Kinetics of Dye-Sensitized Solar Cells based on TiO<sub>2</sub> Nanorod Arrays Sensitized with Different Dyes

Hongxia Wang,<sup>\*a</sup> Meinan Liu,<sup>\*a</sup> Min Zhang,<sup>b</sup> Peng Wang,<sup>b</sup> Hidetoshi Miura,<sup>c</sup> Yan Cheng<sup>a</sup> and John Bell<sup>a</sup>

<sup>a</sup> School of Engineering System, Queensland University of Technology, 2 George Street, Brisbane, QLD4001, Australia

<sup>b</sup> State Key Laboratory of Polymer Physics and Chemistry, Changchun Institute of Applied Chemistry, Chinese Academy of Sciences, Changchun, 130022, China

<sup>c</sup> Chemicrea Inc., Tsukuba Centre, 2-1-6, Sengen, Tsukuba Ibaraki, 305-0047, Japan

Email for corresponding author: [hx.wang@qut.edu.au](mailto:hx.wang@qut.edu.au) and [meinan.liu@qut.edu.au](mailto:meinan.liu@qut.edu.au)

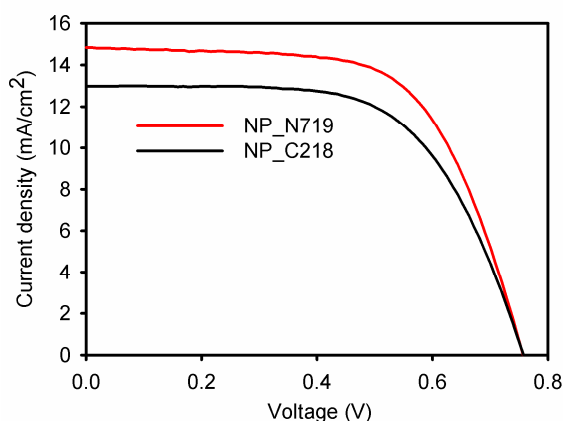

Figure S1. I-V plots of dye-sensitized solar cells based on TiO<sub>2</sub> films consisting of nanoparticle networks sensitized with dye N719 and C218 respectively.
